# Supplementary material for: Hepatitis C Virus Induces the Mitochondrial Translocation of Parkin and Subsequent Mitophagy
Source: PubMed Central journal article supplement (PMC3610669; doi:10.1371/journal.ppat.1003285), 2013-03-28

Figure S8

A

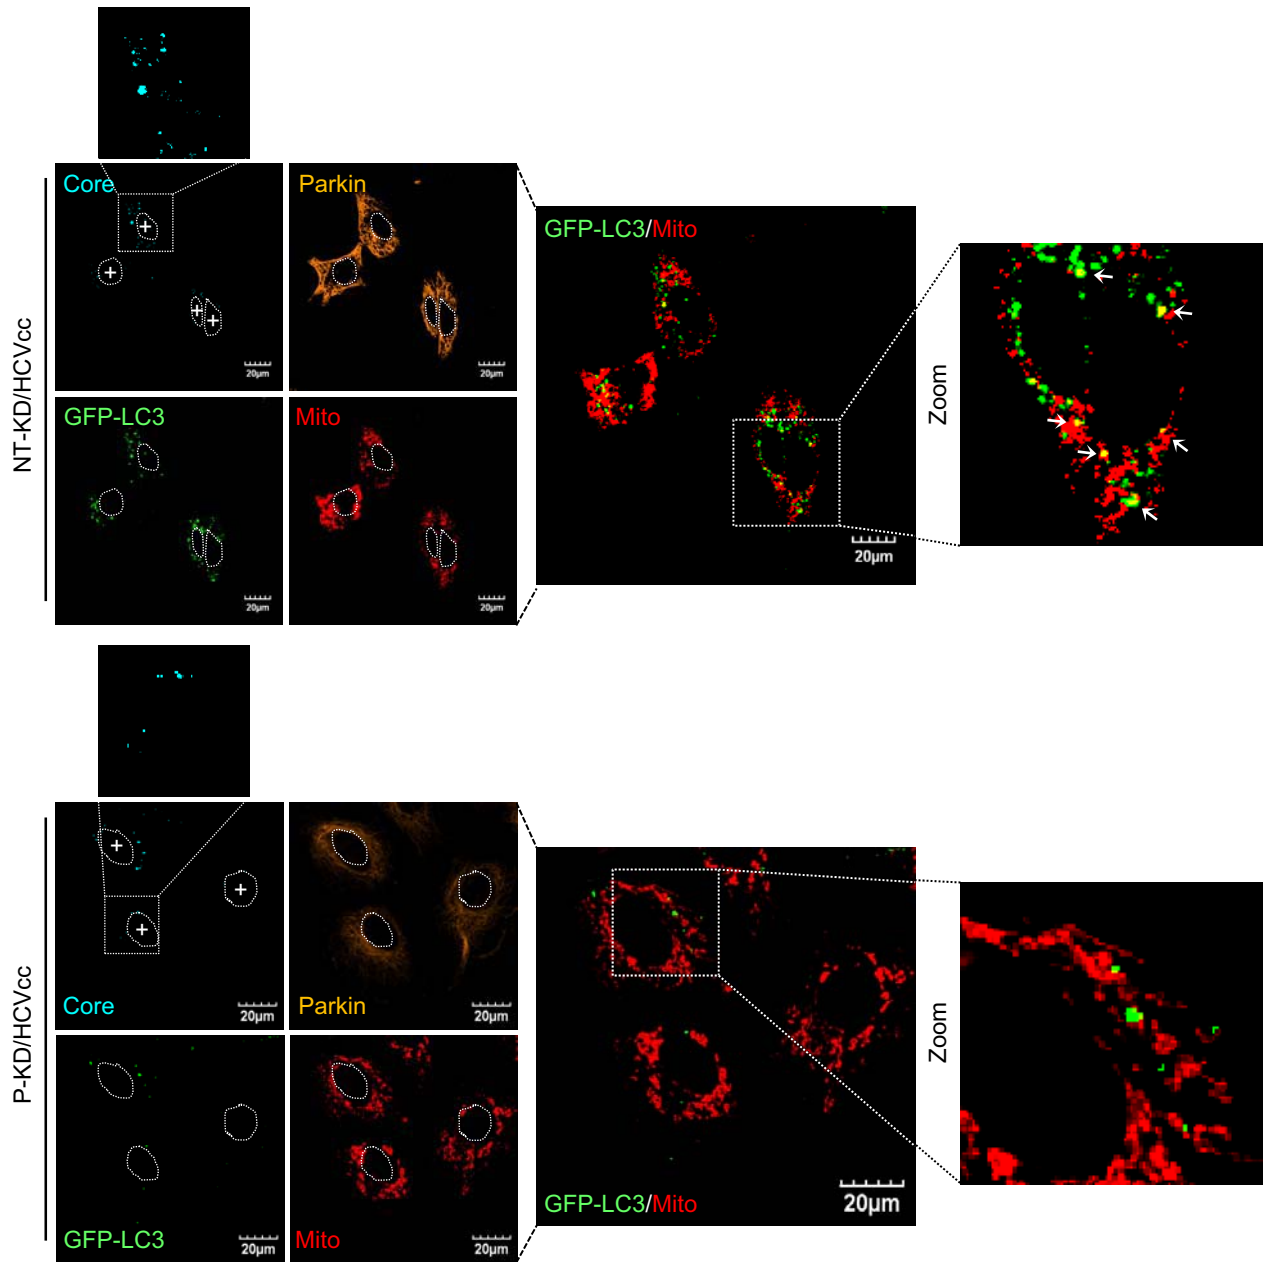

B

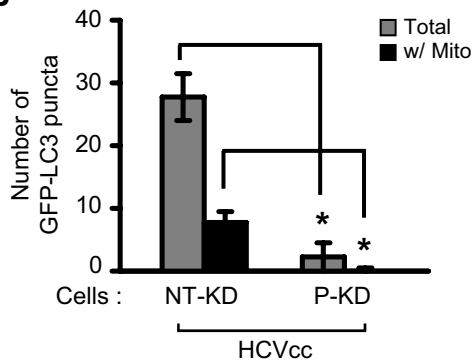

Supplement: ppat.1003285.s008.pdf [file ppat.1003285.s008.pdf]
