# Supplementary material for: Hepatitis C Virus Induces the Mitochondrial Translocation of Parkin and Subsequent Mitophagy
Source: PubMed Central journal article supplement (PMC3610669; doi:10.1371/journal.ppat.1003285), 2013-03-28

# Figure S11

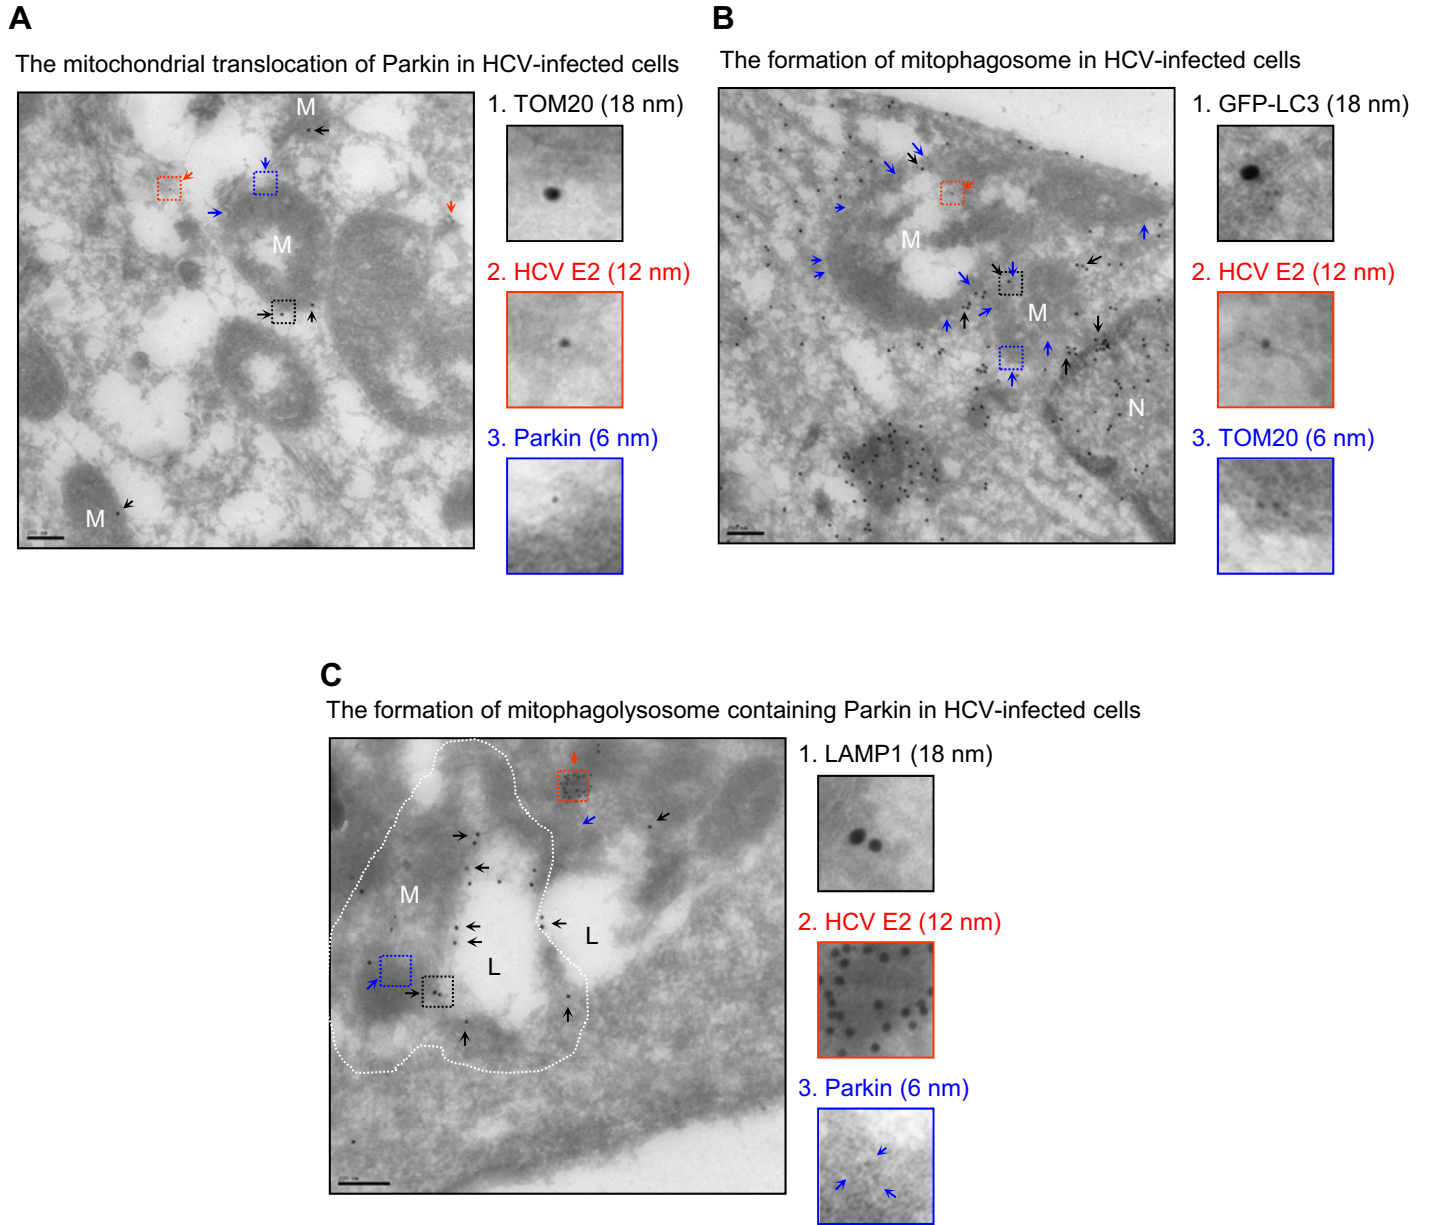

Supplement: ppat.1003285.s011.pdf [file ppat.1003285.s011.pdf]
